# Supplementary material
Source: PubMed Central journal article supplement (PMC4468509)
Supplement: JVI.00474-15_zjv999090495so1.pdf [file JVI.00474-15_zjv999090495so1.pdf]

b) CD4-10-17b CAR includes the following features:

|                         | <b>a.a. #</b> | <b>functional elements</b>                                       |
|-------------------------|---------------|------------------------------------------------------------------|
| <b>CD4 segment</b>      | 1-208;        | <u>signal peptide</u> , <u>D1D2</u>                              |
| <b>10 a.a. linker</b>   | 209-218;      | (G4S) <sub>2</sub>                                               |
| <b>17b scFv</b>         | 219-470;      | V <sub>H</sub> , (G4S) <sub>3</sub> , V <sub>L</sub>             |
| <b>spacer</b>           | 471-473;      | AAA tripeptide                                                   |
| <b>CD28 segment</b>     | 474-580;      | <u>extracellular hinge</u> , <u>TM</u> , intracellular signaling |
| <b>CD3-zeta segment</b> | 581-692;      | intracellular signaling                                          |

1 50

MVRGVPFRHLLLVLQLALLPAATQGKKVVLGKKGDTVELTCTASQKKSIQ  
FHWKNSNQIKILGNQGSFLTTKGPSKLNDRADSRRLWDQGNFPLIIKNLK  
IEDSDTYICEVEDQKEEVQLLVFGLTANSDTHLLQGQSLTTLTLESPPGSS  
PSVQCRSPRGKNIQGKTLSVSQLELQDSGTWTCTVLQNQKKVEFKIDIV  
VLAFQKASGGGGSGGGGSQVQLLESGAEVKKPGSSVKVSCKASGDTFIRY  
SFTWVRQAPGGGLEWMGRIITILDVAHYAPHLQGRVTITADKSTSTVYLE  
LRNLRSDDTAVYFCAGVYEGEADEGEYDNNGFLKHWGQGTLVTVTSGGGG  
SGGGGSGGGGSELELTQSPATLSVSPGERATLSCRASESVSSDLAWYQQK  
PGQAPRLLIYGASTRATGVPARFSGSGSGAEFTLTISLQSEDFAVYYCQ  
QYNNWPPRYTFGQGTRLEIKAAAIEVMYPPPYLDNEKSNGTIIHVKGKHL  
CPSPLFPGPSKPFWVLVVVGGVLACYSLLVTVAFIIFWVRSKRSRLLHSD  
YMNMTPRRPGPTRKHYPYAPPRDFAAYRSRVKFSRSADAPAYQQGQNQL  
YNELNLGRREEYDVLDKRRGRDPEMGGKPRRKNPQEGLYNELQKDKMAEA  
YSEIGMKGERRRGKGHDGLYQGLSTATKDTYDALHMQUALPPR

c) The CD4 CAR includes the following features:

|                         | <b>a.a. # functional elements</b>                                         |
|-------------------------|---------------------------------------------------------------------------|
| <b>CD4 segment</b>      | 1-208; <u>signal peptide</u> , D1D2                                       |
| <b>spacer</b>           | 209-211; AAA tripeptide                                                   |
| <b>CD28 segment</b>     | 212-318; <u>extracellular hinge</u> , <u>TM</u> , intracellular signaling |
| <b>CD3-zeta segment</b> | 319-430; intracellular signaling                                          |

**1** **50**  
MVRGVPFRHLLLVLQLALLPAATQGKKVVLGKKGDTVELTCTASQKKSIQ  
FHWKNSNQIKILGNQGSFLTKGPSKLNDRADSRRSLWDQGNFPLIIKNLK  
IEDSDTYICEVEDQKEEVQLLVFGLTANSDTHLLQGQSLTLTLESPPGSS  
PSVQCRSPRGKNIQGGKTLSVSQLELQDSGTWTCTVLQNQKKVEFKIDIV  
VLAFQKASAAAIEVMYPPPYLDNEKSNGTIIHVKGKHLCPSPLFPGPSKP  
FWLVVVGGVLACYSLLVTVAFIIFWVRSKRSRLLHSDYMNMTPRRPGPT  
RKHYQPYAPPRDFAAYRSRVKFSRSADAPAYQQGQNQLYNELNLGRREEY  
DVLDKRRGRDPEMGGKPRRKNPQEGLYNELQKDKMAEAYSEIGMKGERR  
GKGHDGLYQGLSTATKDTYDALHMQALPPR

d) The CD4-35-DDY3 CAR includes the following features:

|                         | <b>a.a. # functional elements</b>                                         |
|-------------------------|---------------------------------------------------------------------------|
| <b>CD4 segment</b>      | 1-208; <u>signal peptide, D1D2</u>                                        |
| <b>35 a.a. linker</b>   | 209-243; (G4S) <sub>7</sub>                                               |
| <b>DDY scFv</b>         | 244-486; <b>V<sub>H</sub></b> , (G4S) <sub>3</sub> , <b>V<sub>L</sub></b> |
| <b>spacer</b>           | 487-489; AAA tripeptide                                                   |
| <b>CD28 segment</b>     | 490-593; <u>extracellular hinge, TM</u> , intracellular signaling         |
| <b>CD3-zeta segment</b> | 594-708; intracellular signaling                                          |

1 50

MVRGVPFRHLLLVLQLALLPAATQGKKVVLGKKGDTVELTCTASQKKSIQ  
FHWKNSNQIKILGNQGSFLTKGPSKLNDRADSRRLWDQGNFPLIIKNLK  
IEDSDTYICEVEDQKEEVQLLVFGLTANSDTHLLQGQSLTTLTLESPPGSS  
PSVQCRSPRGKNIQGKTLSVSQLELQDSGTWTCTVLQNQKKVEFKIDIV  
VLAFQKASGGGGSGGGGSGGGGSGGGGSGGGGSGGGGSGGGGSEVQLVQS  
GAEVKKPGATVKISCKVSGYTFDYYMHVWVQQAPGKGLEWMGLVDPEDGE  
TIYAEKFQGRVTITADTSTDTAYMELSSLRSEDTAVYYCATERTDYWGQG  
TLVTVSSGGGGSGGGGSGGGGSEIVLTQSPLSLSVTPGEPASISCRSSQS  
LLDSDDGNTYLDWYLQKPGQSPQLLIYEVSNRFSGVPDRFSGSGSGTDFT  
LKISRVEAEDVGVYYCMQSIQLPWTFGQGTKLEIKRAAAIEVMYPPPYLD  
NEKSNGTIIHVKGKHLCPSPLPFGPSKPFWVLVVVGGVLACYSLLVTVAE  
IIFWVRSKRSRLLHSDYMNMTPRRPGPTRKHYQPYAPPRDFAAYRSRVKF  
SRSADAPAYQQGQNQLYNELNLGRREEYDVLDKRRGRDPEMGGKPRRKNP  
QEGLYNELQKDKMAEAYSEIGMKGERRRGKGHDGLYQGLSTATKDTYDAL  
HMQUALPPR

e) The 139 CAR includes the following features:

|                         | <b>a.a. #</b> | <b>functional elements</b>                                       |
|-------------------------|---------------|------------------------------------------------------------------|
| <b>signal peptide</b>   | <u>1-22;</u>  |                                                                  |
| <b>139 scFv</b>         | 23-262;       | <b>V<sub>H</sub></b> , “128 linker”, <b>V<sub>L</sub></b>        |
| <b>spacer</b>           | 263-265;      | AAA tripeptide                                                   |
| <b>CD28 segment</b>     | 266-372;      | <b>extracellular hinge</b> , <b>TM</b> , intracellular signaling |
| <b>CD3-zeta segment</b> | 373-484;      | intracellular signaling                                          |

**1** **50**  
**MVLLVTSLLLCELPHPAFLLI****PD****IQMTQSPSSLSASVGD****RV****TTITCRASQ**  
**IRNNLAWYQQKPGKAPKRLIYAASN****LQSGVPSRFTGSGSGTEFTLIVSSL**  
**QPEDFATYYCLQHHSYPLTSGGGTKVEIKRTG****STSGSGKPGSGEGSEVQV**  
**LESGGGLVQPGGSLRLSCAASGFTFSSYAMSWVRQAPGKGLEWVSAISGS**  
**GGSTNYADSVKGRFTISRDN****SKNTLYLQMNSLRAEDTAVYYCAGSSGWSE**  
**YWGQGLVTVSSAAAIEVMYPPPYLDNEKSNGTIIHVKGKHLCP****SPLFPG**  
**PSKPFWLVVVGGLACYSLLVTVAFIIFWVRSKR****SRL****LHSDYMNMT****PRR**  
**PGPTRKHYQPYAPPRDFAAYRSRVKFSRSADAPAYQQGQNQLYNELNLGR**  
**REEYDVL****DKRRGRDPEMGGKPRRKNPQEGLYNELQKDKMAEAYSEIGMKG**  
**ERRRGKGHDGLYQGLSTATKDTYDALHMQALPPR**
